# Supplementary material for: Selective recognition and extraction of KBr via cooperative interactions with a urea functionalized crown ether dual-host
Source: Royal Society of Chemistry journal article supplement (doi:10.1039/c5cc07291c), 2015-01-01
Supplement: c5cc07291c1.pdf [file c5cc07291c1.pdf]

Supporting Information

**Selective Recognition and Extraction of KBr via Cooperative Interactions  
with a Urea Functionalized Crown Ether Dual-host**

Bidyut Akhuli and Pradyut Ghosh\*

*Department of Inorganic Chemistry, Indian Association for the Cultivation of Science, 2A & 2B Raja S. C. Mullick Road,  
Kolkata 700 032, India*

## Table of Contents

|                                                                                                                                              |     |
|----------------------------------------------------------------------------------------------------------------------------------------------|-----|
| Synthesis of <b>L</b> .....                                                                                                                  | S3  |
| <sup>1</sup> H-NMR Titrations Studies Details.....                                                                                           | S3  |
| Isothermal Titration Calorimetric (ITC) Studies Details.....                                                                                 | S3  |
| Solid-Liquid Extraction Studies Details.....                                                                                                 | S3  |
| <b>Figure S1</b> ESI-MS (+ve) spectrum of <b>L</b> .....                                                                                     | S4  |
| <b>Figure S2</b> <sup>1</sup> H-NMR spectrum of <b>L</b> .....                                                                               | S4  |
| <b>Figure S3</b> <sup>13</sup> C-NMR spectrum of <b>L</b> .....                                                                              | S5  |
| <b>Figure S4</b> ESI-MS (-ve) spectrum of <b>L</b> .....                                                                                     | S5  |
| <b>Figure S5</b> ESI-MS (-ve) spectrum of extracted mass of <b>L</b> with KCl.....                                                           | S6  |
| <b>Figure S6</b> ESI-MS (-ve) spectrum of extracted mass of <b>L</b> with KBr.....                                                           | S6  |
| <b>Figure S7</b> ESI-MS (-ve) spectrum of extracted mass of <b>L</b> with KNO <sub>3</sub> .....                                             | S7  |
| <b>Figure S8</b> ESI-MS (-ve) spectrum of extracted mass of <b>L</b> with mixture of KCl, KBr and KNO <sub>3</sub> .....                     | S7  |
| <b>Figure S9</b> Comparative <sup>1</sup> H-NMR spectra of extracted masses.....                                                             | S8  |
| <b>Figure S10</b> SEM-EDX experiments of extracted mass obtained from mixtures.....                                                          | S8  |
| <b>Figure S11</b> Qualitative <sup>1</sup> H-NMR spectrum of <b>L</b> in presence of 1:1 ratio of TBA-anuions.....                           | S9  |
| <b>Figure S12</b> Equivalence plot of <sup>1</sup> H-NMR titration of <b>L</b> with TBA-Cl.....                                              | S9  |
| <b>Figure S13</b> Equivalence plot of <sup>1</sup> H-NMR titration of <b>L</b> with TBA-Br.....                                              | S10 |
| <b>Figure S14</b> Equivalence plot of <sup>1</sup> H-NMR titration of <b>L</b> with TBA-NO <sub>3</sub> .....                                | S10 |
| <b>Figure S15</b> Equivalence plot of <sup>1</sup> H-NMR titration of <b>L</b> with TBA-HSO <sub>4</sub> .....                               | S11 |
| <b>Figure S16</b> Equivalence plot of <sup>1</sup> H-NMR titration of <b>L</b> with TBA-Cl in presence of K <sup>+</sup> .....               | S11 |
| <b>Figure S17</b> Equivalence plot of <sup>1</sup> H-NMR titration of <b>L</b> with TBA-Br in presence of K <sup>+</sup> .....               | S12 |
| <b>Figure S18</b> Equivalence plot of <sup>1</sup> H-NMR titration of <b>L</b> with TBA-NO <sub>3</sub> in presence of K <sup>+</sup> .....  | S12 |
| <b>Figure S19</b> Equivalence plot of <sup>1</sup> H-NMR titration of <b>L</b> with TBA-HSO <sub>4</sub> in presence of K <sup>+</sup> ..... | S13 |
| <b>Figure S20</b> ITC profile of Cl <sup>-</sup> binding to host <b>L</b> in absence of K <sup>+</sup> .....                                 | S13 |
| <b>Figure S21</b> ITC profile of Cl <sup>-</sup> binding to host <b>L</b> in presence of K <sup>+</sup> .....                                | S14 |

## Experimental Section

### *Synthesis of L<sup>1</sup>:*

In a 50 ml round bottomed flask, 4'-aminodibenzo-18-crown-6 (100 mg, 0.27 mmol) was dissolved in 15 ml of dry DCM. The mixture was allowed to stir at 0°C temperature in nitrogen atmosphere for 15 min. 40 µL (0.3 mmol) of pentafluorophenyl isocyanate was dissolved in another 15 mL of dry DCM and taken in a 25 mL pressure equalizing funnel. This solution was added drop-wise for a period of 1 hour with constant stirring at 0°C temperature. After the addition, the reaction mixture was allowed to stir at room temperature in nitrogen atmosphere for another 12 h. The white precipitate was filtered, and washed three times with DCM. Then the precipitate was dried in vacuum to yield the desired product as white solid (145 mg, 92%). ESI-HRMS (+Ve): m/z calcd. for C<sub>27</sub>H<sub>25</sub>F<sub>5</sub>N<sub>2</sub>NaO<sub>7</sub> [M + Na]<sup>+</sup>, 607.1479, found 607.1478. <sup>1</sup>H-NMR (300 MHz, DMSO-*d*<sub>6</sub>): δ 8.88 (s, 1H, -NH), 8.39 (s, 1H, -NH), 7.13 (d, 1H, *J* = 1.8 Hz Ar-*H*), 6.95-6.83 (m, 6H, Ar-*H*), 4.06-3.99 (m, 8H, -O-CH<sub>2</sub>), 3.82 (s, 8H, -O-CH<sub>2</sub>). <sup>13</sup>C-NMR (100 MHz, DMSO-*d*<sub>6</sub>): δ 152.1 (-C=O), 148.0 (Ar-C), 147.9 (Ar-C), 143.6 (Ar-C), 132.6 (Ar-C), 120.8 (Ar-C), 113.0 (Ar-C), 112.6 (Ar-C), 110.7 (Ar-C), 104.8 (Ar-C), 69.1 (-O-CH<sub>2</sub>), 69.0 (-O-CH<sub>2</sub>), 68.9 (-O-CH<sub>2</sub>), 68.03 (-O-CH<sub>2</sub>), 67.8 (-O-CH<sub>2</sub>), 67.7 (-O-CH<sub>2</sub>).

### *<sup>1</sup>H-NMR Titrations Studies Details:*

Binding constants were obtained by <sup>1</sup>H-NMR (300 MHz) titrations of L<sup>1</sup> with different anions (as TBA-salt) such as Cl<sup>-</sup>, Br<sup>-</sup>, NO<sub>3</sub><sup>-</sup> and HSO<sub>4</sub><sup>-</sup> in CD<sub>3</sub>CN at 25°C. The initial concentration of L<sup>1</sup> was ~2 mM. Aliquots of anions were added from a stock solutions ~10-20 mM. Tetramethylsilane (TMS) in CD<sub>3</sub>CN was used as an internal reference, and each titration was performed by 15-20 measurements at room temperature. All proton signals were referred to TMS. The association constant (*K*), values were calculated by fitting the change in the urea-NH chemical shift with a 1:1 association model with non-linear least square analysis. The equation  $\Delta\delta = \frac{([A]_0 + [L]_0 + 1/K) \pm \{([A]_0 + [L]_0 + 1/K)^2 - 4[L]_0[A]_0\}^{1/2}}{2[L]_0} \Delta\delta_{\max}$  was used to determine the *K* values.

### *Isothermal Titration Calorimetric (ITC) Studies Details:*

The titrations were carried out at 298 K in freshly distilled acetonitrile. A solution of L in acetonitrile was placed in the measuring cell. This solution was then titrated with 30 injections of 10 µL of TBACl solution that was prepared in acetonitrile. An interval of 220 s was allowed between each injection, and the stirring speed was set at 329 rpm. The obtained data was processed by using Origin 7.0 software that was supplied with the instrument and was fitted to a one-site binding model. A blank titration of plain solvent was also performed and subtracted from the corresponding titration to remove any effect from the heats of dilution from the titrant.

### *Solid-Liquid Extraction Studies Details:*

For solid-liquid extraction studies, L (1.2 mg) was dissolved in 1 ml CD<sub>3</sub>CN/CH<sub>3</sub>CN (2 mM concentration) in a 2 ml glass vial. Then excess of respective solid Na<sup>+</sup>/K<sup>+</sup> salt (5 equivalents with respect to L) was added in the solution of L. The solid salts remain insoluble in CD<sub>3</sub>CN/CH<sub>3</sub>CN. The mixture was allowed to sonicate for 1hr on a sonicator bath at room temperature. Then the solution was filtered through Whatman-42 filter paper and filtrate was allowed to different studies like <sup>1</sup>H-NMR, ESI-MS and EDX.”

**Figure S1** ESI-MS (+ve) spectrum of ligand **L**.

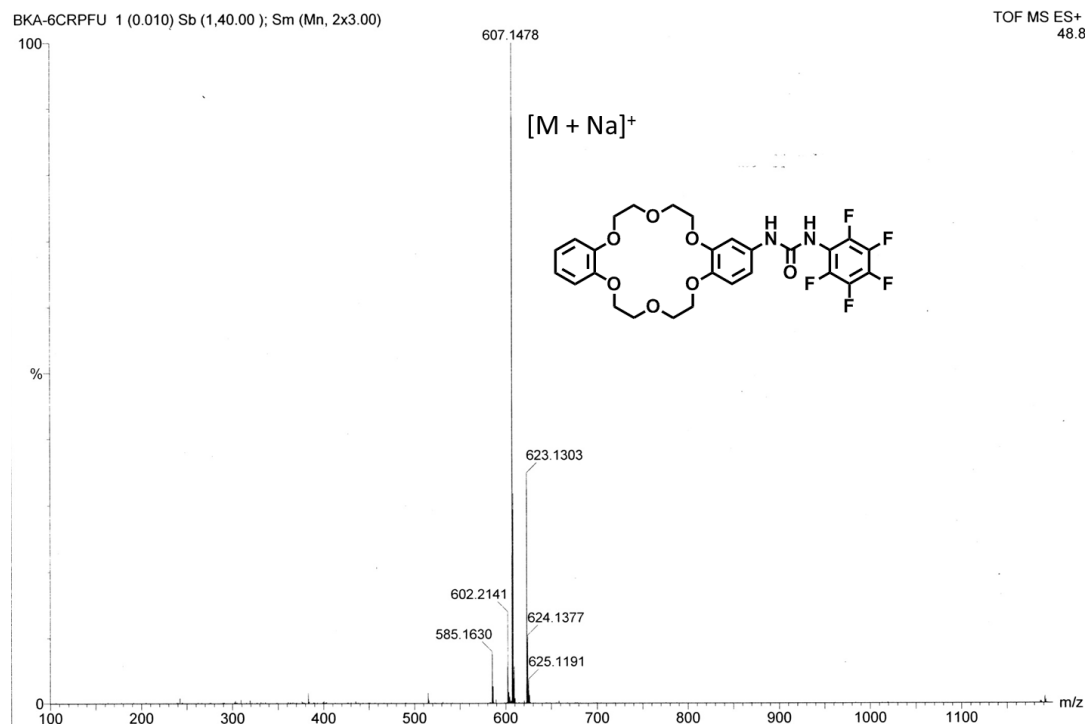

**Figure S2** 300 MHz <sup>1</sup>H-NMR spectrum of **L** in DMSO-*d*<sub>6</sub> at 25°C.

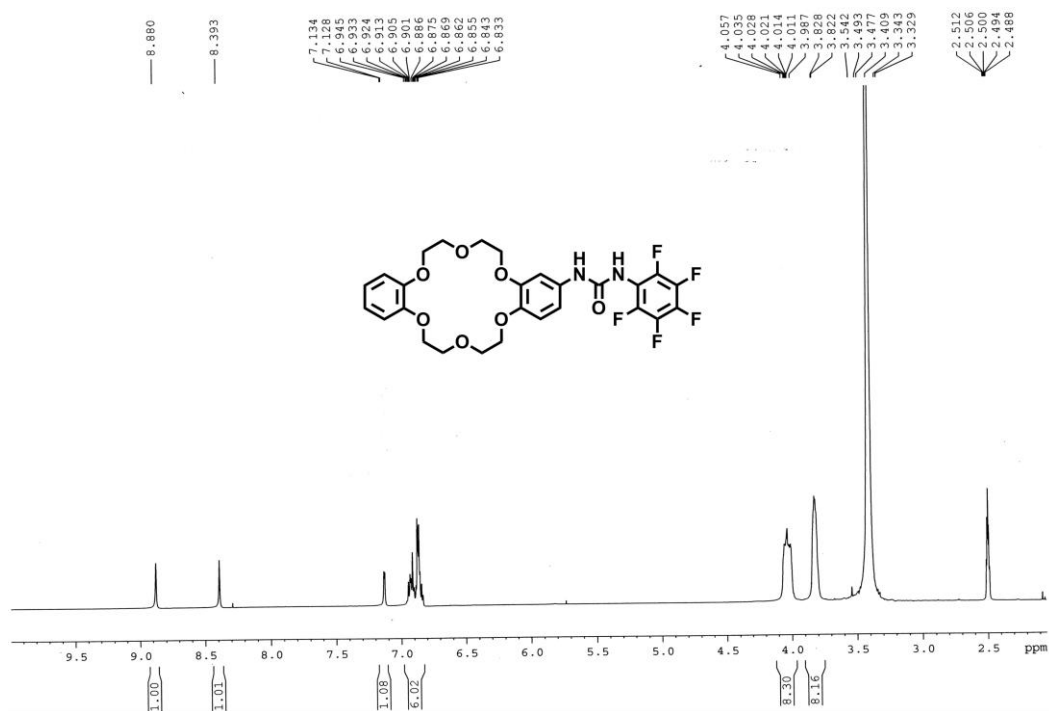

**Figure S3** 100 MHz  $^{13}\text{C}$ -NMR spectrum of **L** in  $\text{DMSO}-d_6$  at  $25^\circ\text{C}$ .

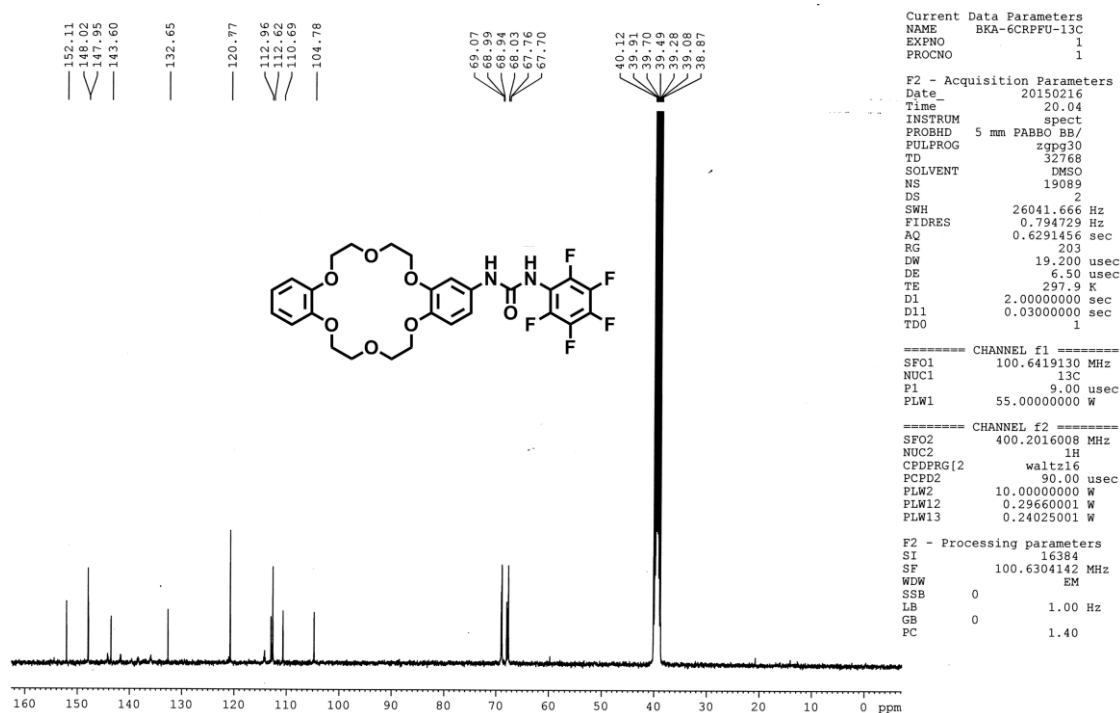

**Figure S4** ESI-MS (-ve) spectrum of **L**.

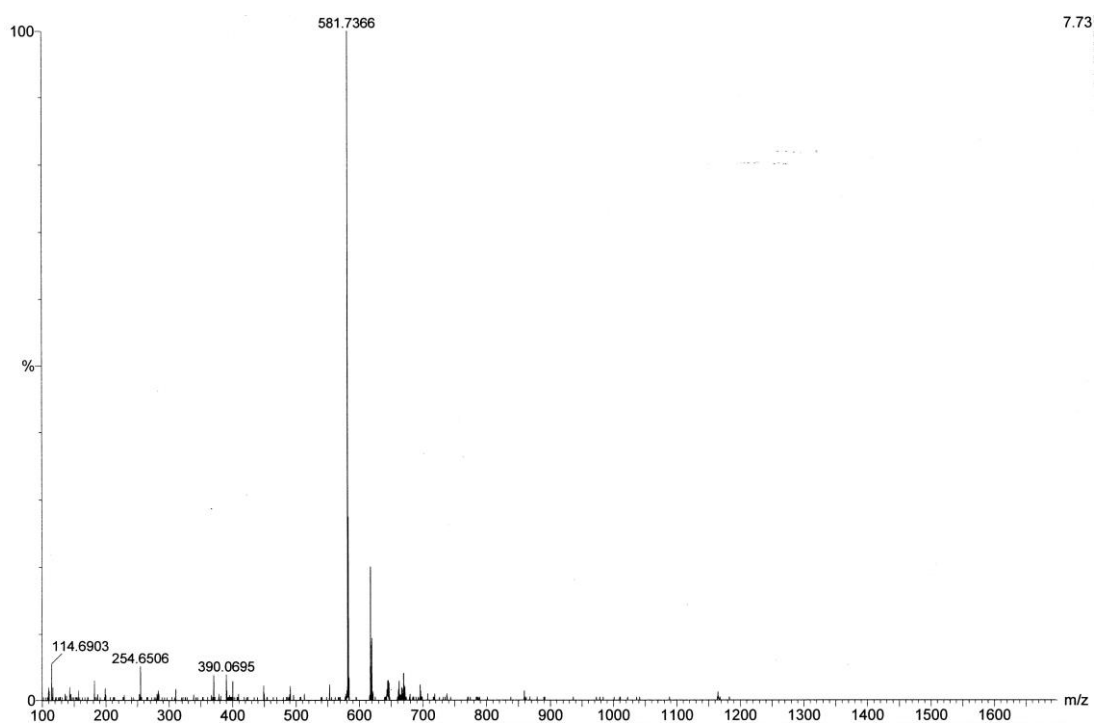

**Figure S5** ESI-MS (-ve) spectrum of extracted mass obtained from the solid-liquid extraction of **L** with KCl.

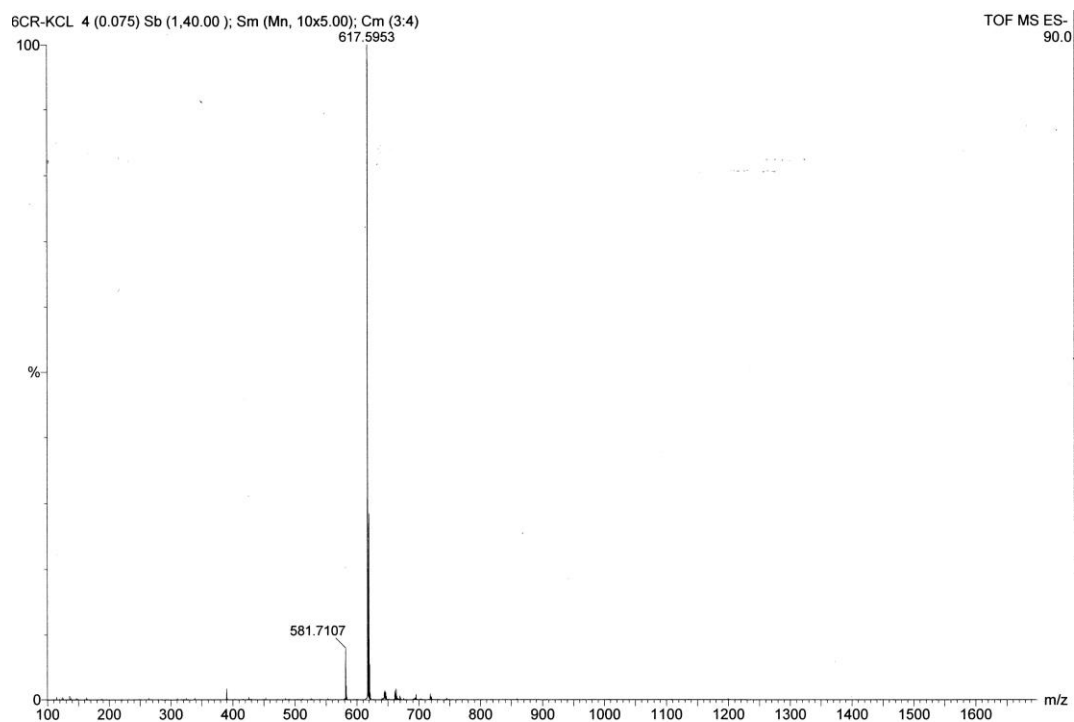

**Figure S6** ESI-MS (-ve) spectrum of extracted mass obtained from the solid-liquid extraction of **L** with KBr.

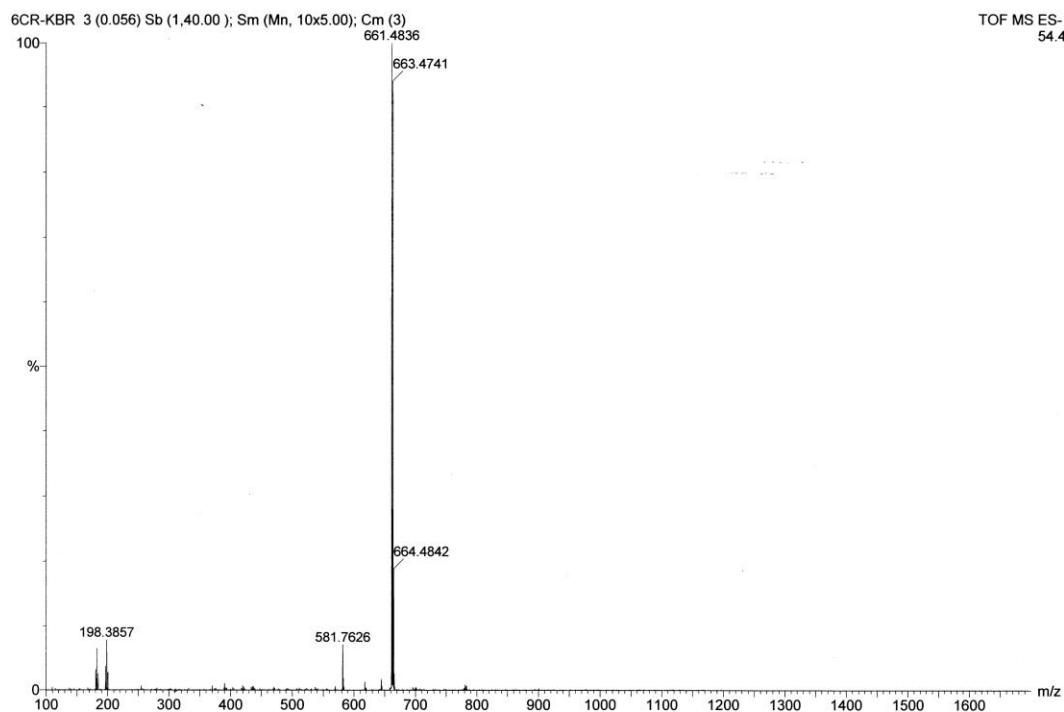

**Figure S7** ESI-MS (-ve) spectrum of extracted mass obtained from the solid-liquid extraction of **L** with  $\text{KNO}_3$ .

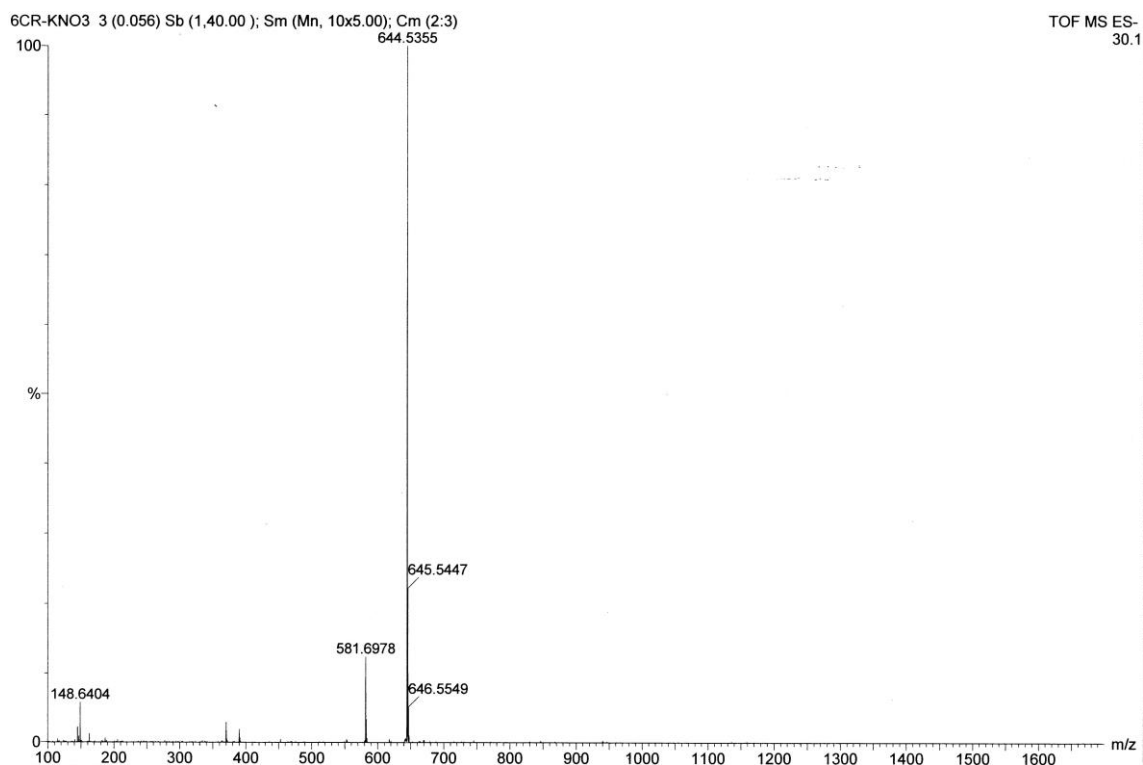

**Figure S8** ESI-MS (-ve) spectrum of extracted mass obtained from the solid-liquid extraction of **L** with mixtures of KCl, KBr and  $\text{KNO}_3$ .

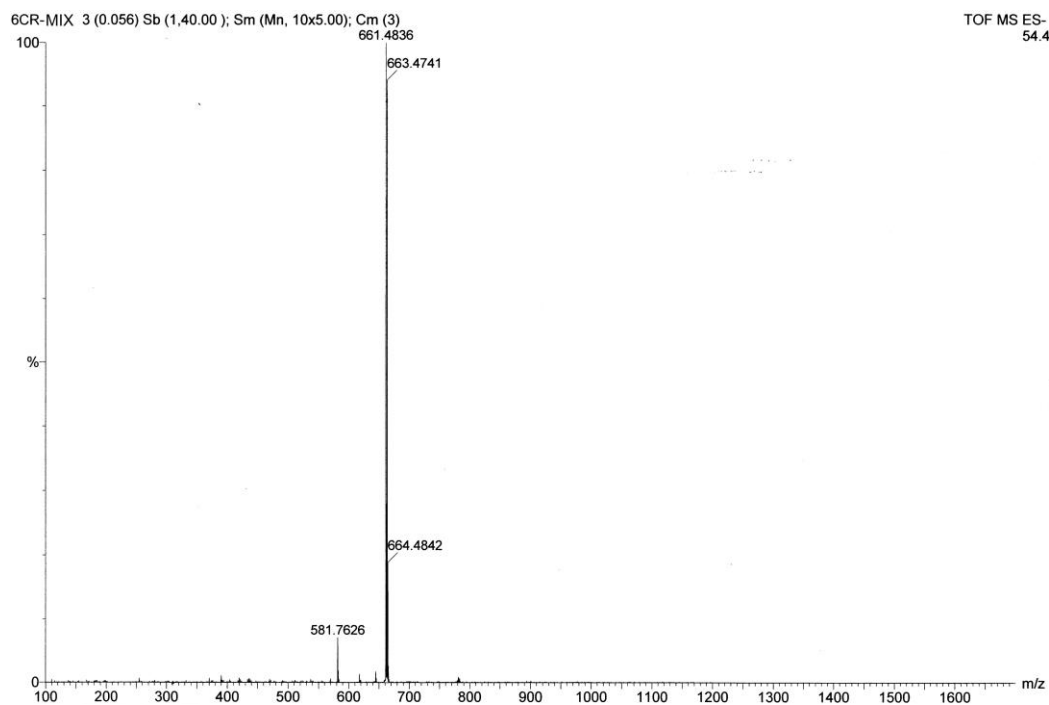

**Figure S9** Comparative  $^1\text{H}$ -NMR spectra of extracted mass obtained from the solid-liquid extraction of **L** with mixtures of  $\text{K}^+$  salts and  $^1\text{H}$ -NMR spectra of extracted mass obtained from the solid-liquid extraction of **L** only with KBr in  $\text{CD}_3\text{CN}$  at  $25^\circ\text{C}$ .

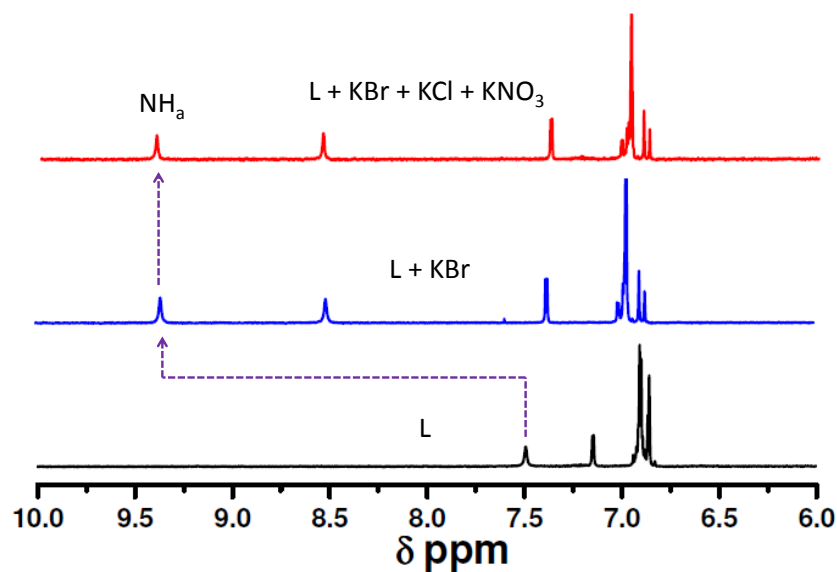

**Figure S10** SEM-EDX experiments of of extracted mass obtained from the solid-liquid extraction of **L** with mixtures of KCl, KBr and  $\text{KNO}_3$ .

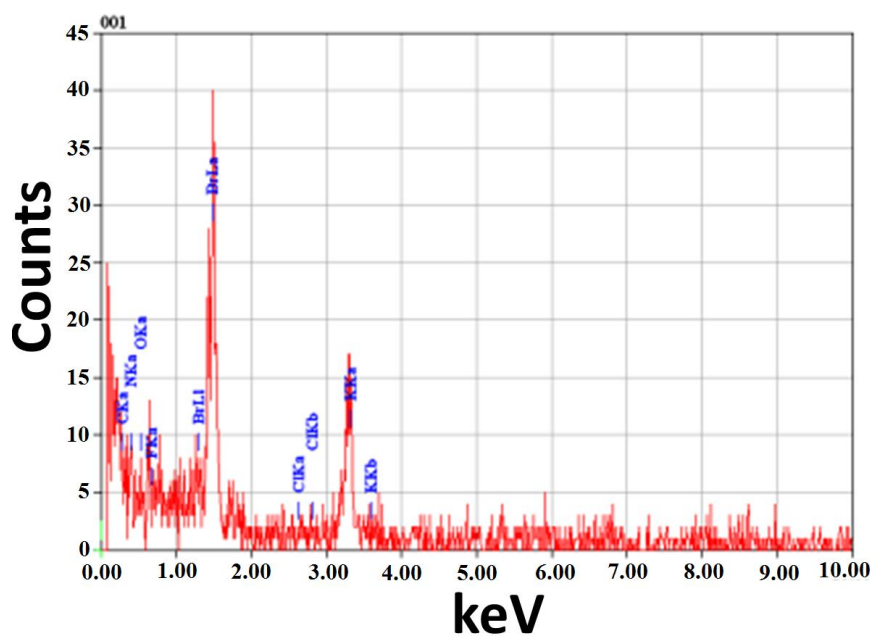

| Ele... | Cl... | (keV) | mass%  | Error% | At%    |
|--------|-------|-------|--------|--------|--------|
| C      | K     |       |        |        |        |
| N      | K     | 0.392 | 42.50  | 2.15   | 59.32  |
| O      | K     | 0.525 | 24.21  | 2.76   | 29.58  |
| F      | K     | 0.677 | 0.91   | 1.77   | 0.94   |
| Cl     | K     |       |        |        |        |
| K      | K     | 3.312 | 8.75   | 0.41   | 4.37   |
| Br     | L     | 1.480 | 23.63  | 0.74   | 5.78   |
| Total  |       |       | 100.00 |        | 100.00 |



**Figure S11** Qualitative  $^1\text{H}$ -NMR spectrum of **L** in presence of 1:1 ratio of TBA-anuions in  $\text{CD}_3\text{CN}$  at  $25^\circ\text{C}$  showing the chemical shifts of urea- $\text{NH}_a$  proton.

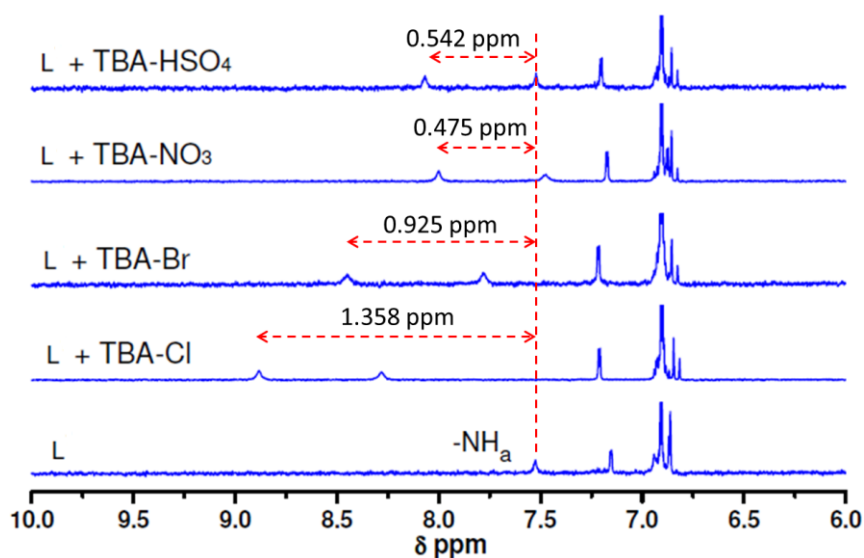

**Figure S12** Plot of change in chemical shift of the urea- $\text{NH}_a$  proton of **L** with increasing amounts of TBA-Cl in  $\text{CD}_3\text{CN}$  at 298 K.

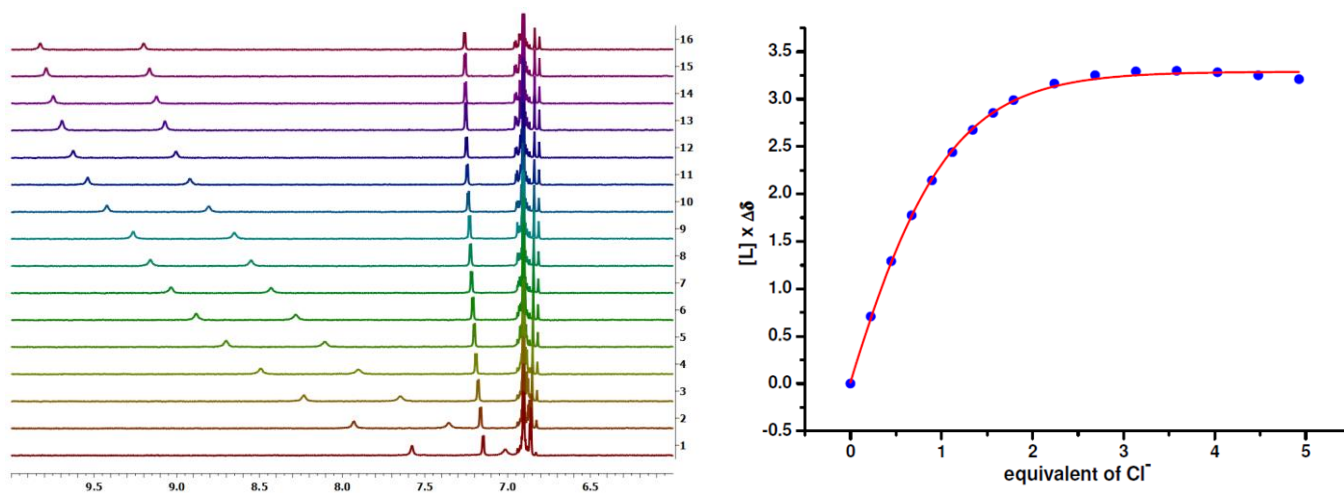

**L: 2.0565 mmol; TBA-Cl: 23.0282 mmol.**

**Figure S13** Plot of change in chemical shift of the urea-NH<sub>a</sub> proton of **L** with increasing amounts of TBA-Br in CD<sub>3</sub>CN at 298 K.

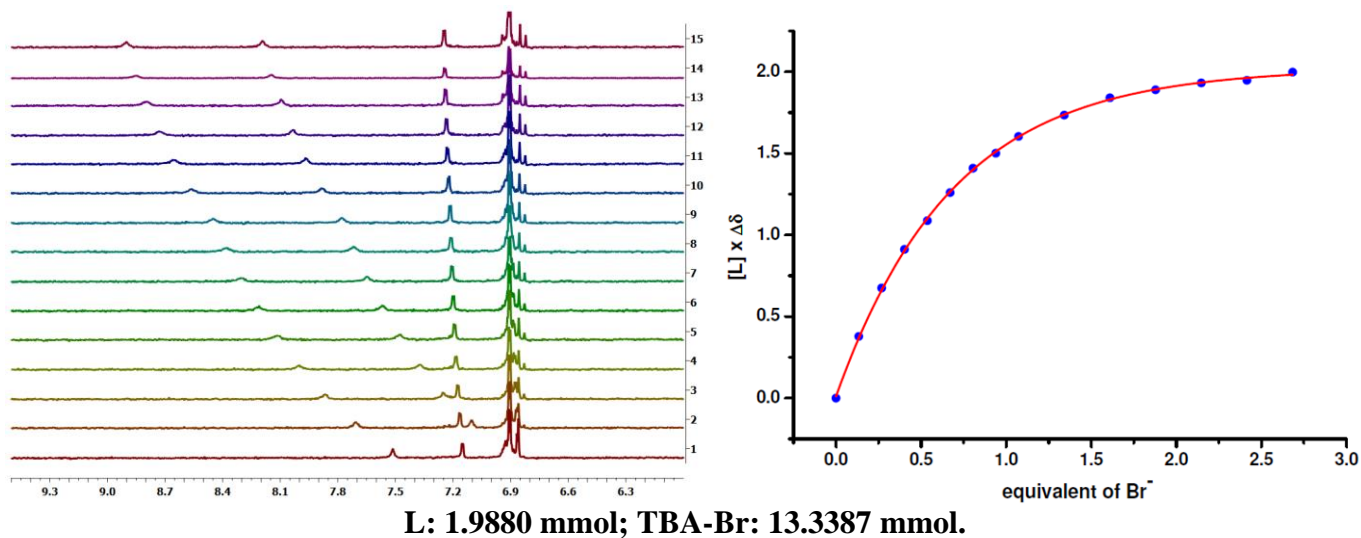

**Figure S14** Plot of change in chemical shift of the urea-NH<sub>a</sub> proton of **L** with increasing amounts of TBA-NO<sub>3</sub> in CD<sub>3</sub>CN at 298 K.

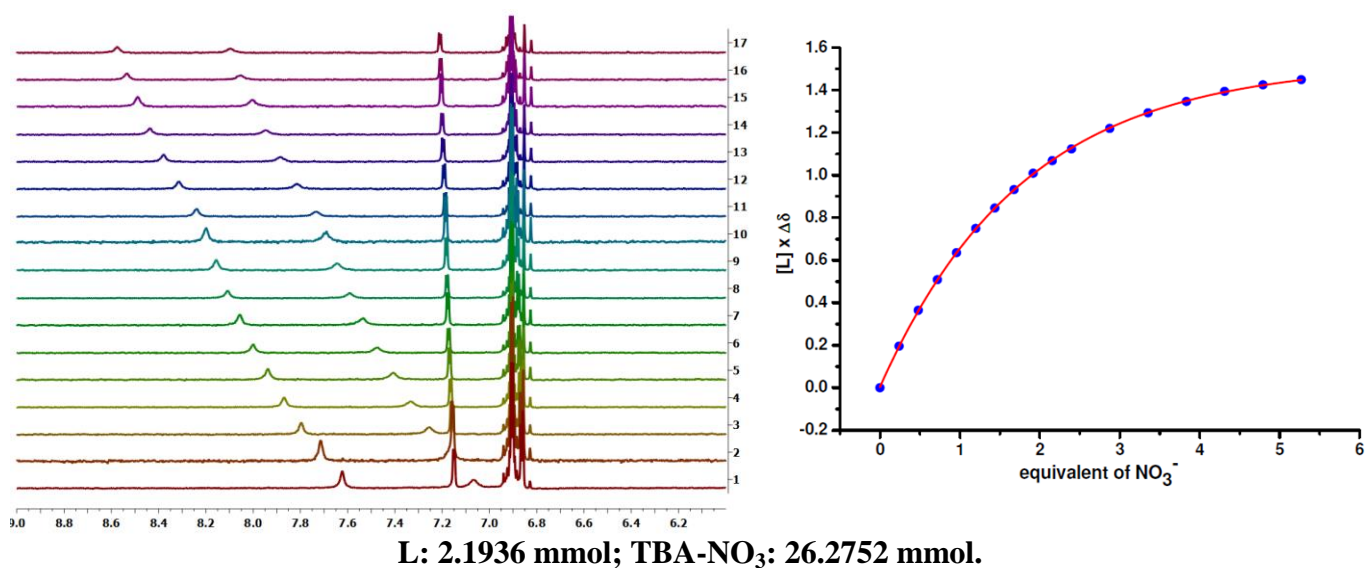

**Figure S15** Plot of change in chemical shift of the urea-NH<sub>a</sub> proton of **L** with increasing amounts of TBA-HSO<sub>4</sub> in CD<sub>3</sub>CN at 298 K.

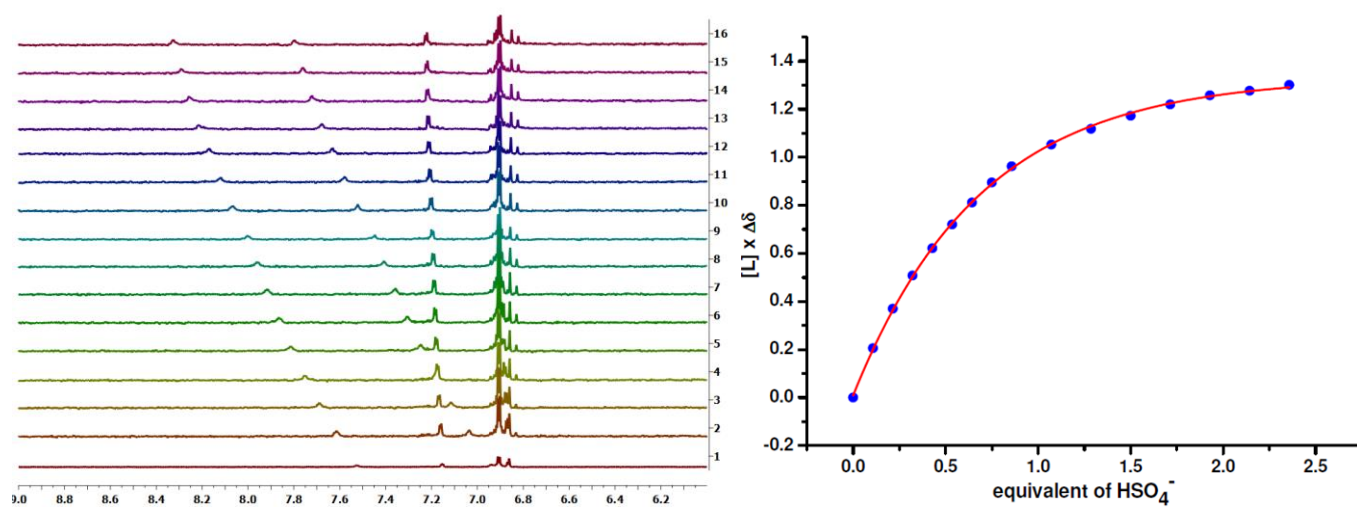

**L**: 2.3307 mmol; TBA-HSO<sub>4</sub>: 12.4878 mmol.

**Figure S16** Plot of change in chemical shift of the urea-NH<sub>a</sub> proton of **L** with increasing amounts of TBA-Cl in presence of K<sup>+</sup> in CD<sub>3</sub>CN at 298 K.

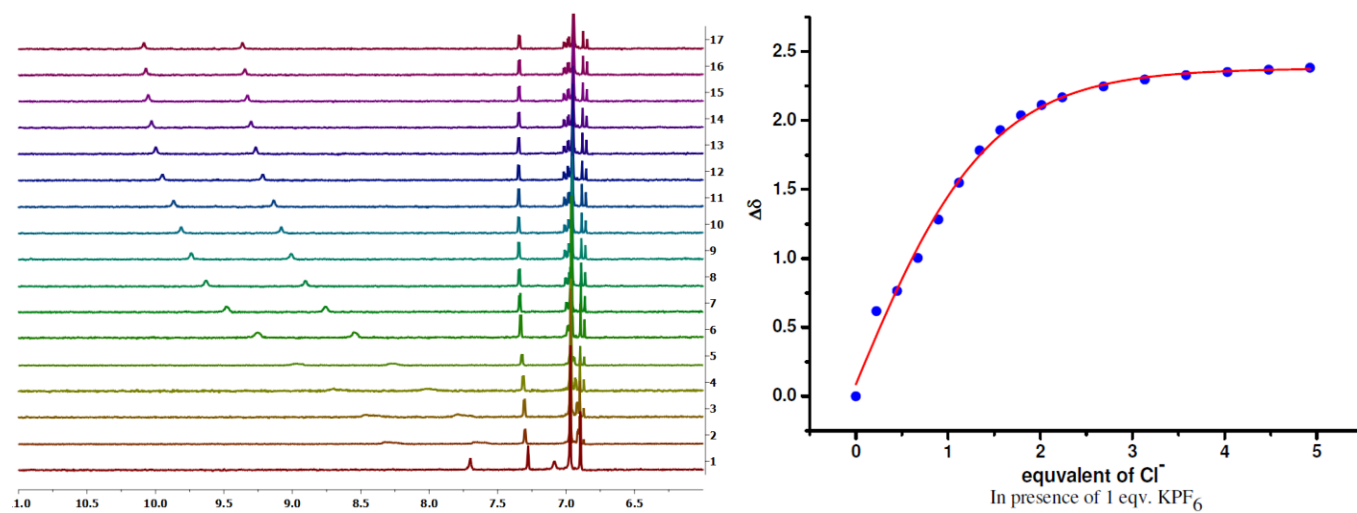

**L**: 2.0565 mmol; TBA-Cl: 23.0282 mmol.

**Figure S17** Plot of change in chemical shift of the urea-NH<sub>a</sub> proton of **L** with increasing amounts of TBA-Br in presence of K<sup>+</sup> in CD<sub>3</sub>CN at 298 K.

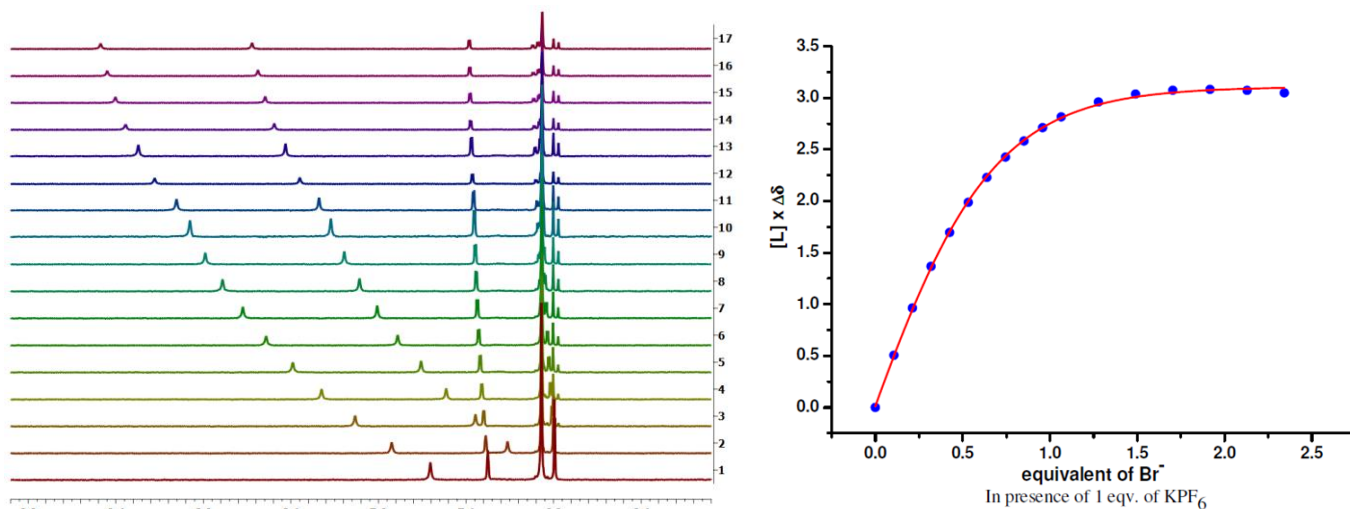

**L: 2.3307 mmol; TBA-Br: 12.4081 mmol.**

**Figure S18** Plot of change in chemical shift of the urea-NH<sub>a</sub> proton of **L** with gradual addition of TBA-NO<sub>3</sub> in presence of K<sup>+</sup> in CD<sub>3</sub>CN at 298 K.

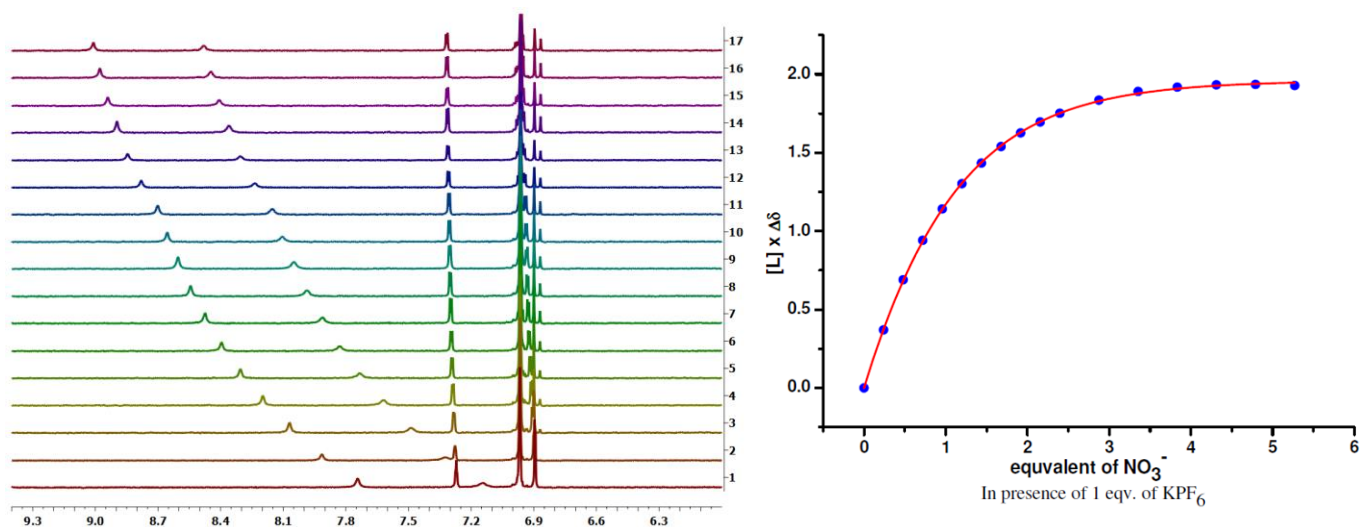

**L: 2.1936 m.mol; TBA-NO<sub>3</sub>: 26.2752 m.mol**

**Figure S19** Plot of change in chemical shift of the urea-NH<sub>a</sub> proton of **L** with gradual addition of TBA-HSO<sub>4</sub> in presence of K<sup>+</sup> in CD<sub>3</sub>CN at 298 K.

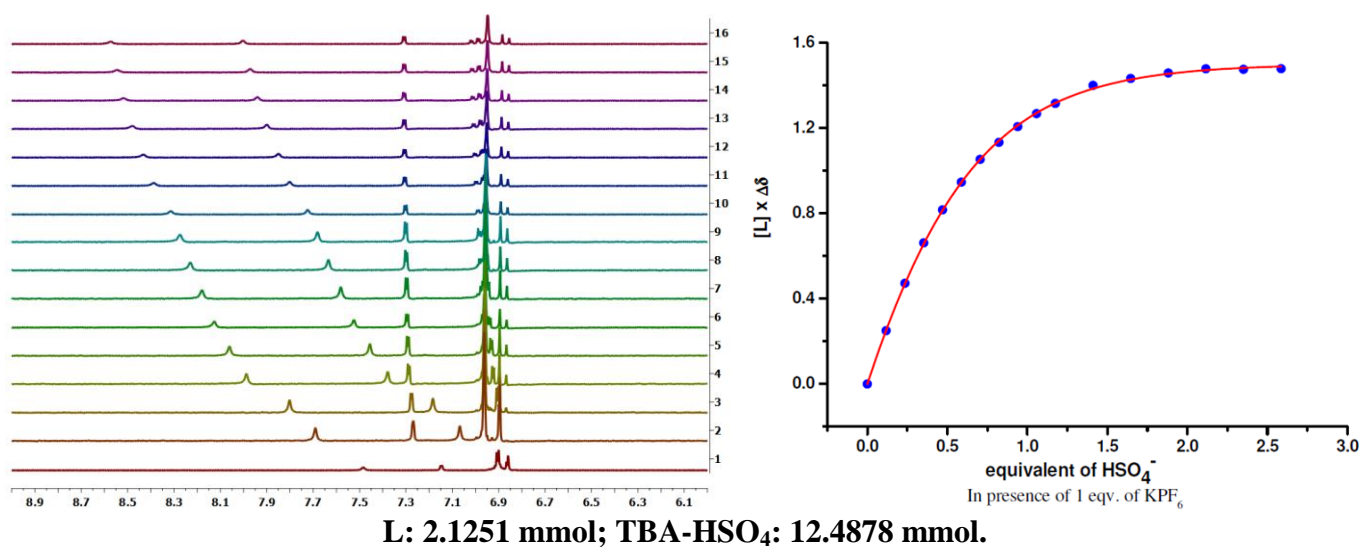

**Figure S20** ITC profile of Cl<sup>-</sup> (14.1048 mM) binding to host **L** (1.006 mM) in dry CH<sub>3</sub>CN at 298 K in absence of K<sup>+</sup>.

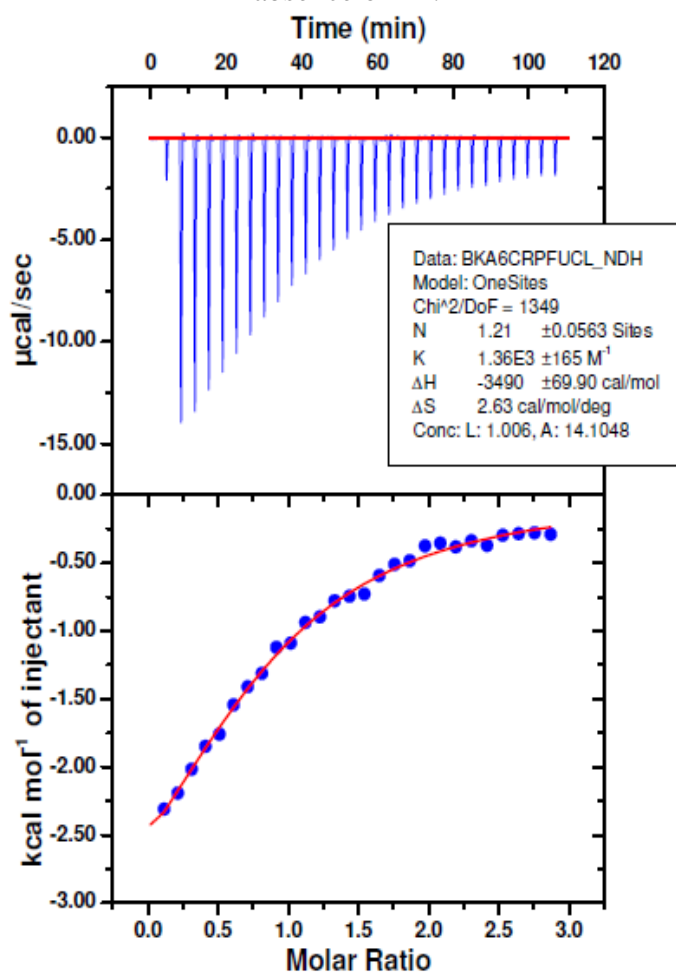

The upper panel shows the heat pulses experimentally observed in each titration step. The lower panel reports the respective time integrals translating as the heat absorbed for each aliquot and its coherence to a 1:1 binding model.

**Figure S21** ITC profile of  $\text{Cl}^-$  (14.1048 mM) binding to host **L** (1.006 mM) in dry  $\text{CH}_3\text{CN}$  at 298 K in presence of 1 equivalent of  $\text{K}^+$ .

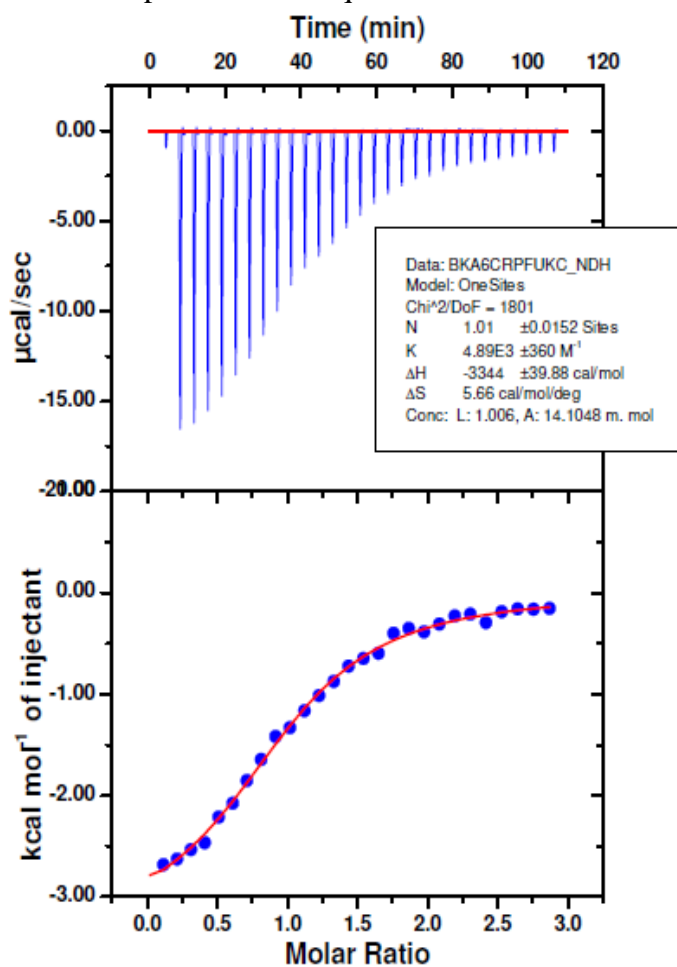

The upper panel shows the heat pulses experimentally observed in each titration step. The lower panel reports the respective time integrals translating as the heat absorbed for each aliquot and its coherence to a 1:1 binding model.
